# Supplementary figures and images for: Novel information on the morphology, phylogeny and distribution of camallanid nematodes from marine and freshwater hosts in South Africa, including the description of Camallanus sodwanaensis n. sp
Source: PubMed Central journal article supplement — Int J Parasitol Parasites Wildl. 2019 Sep 30;10:263–73. doi: 10.1016/j.ijppaw.2019.09.007 (PMC6806417; doi:10.1016/j.ijppaw.2019.09.007), 2019-09-30

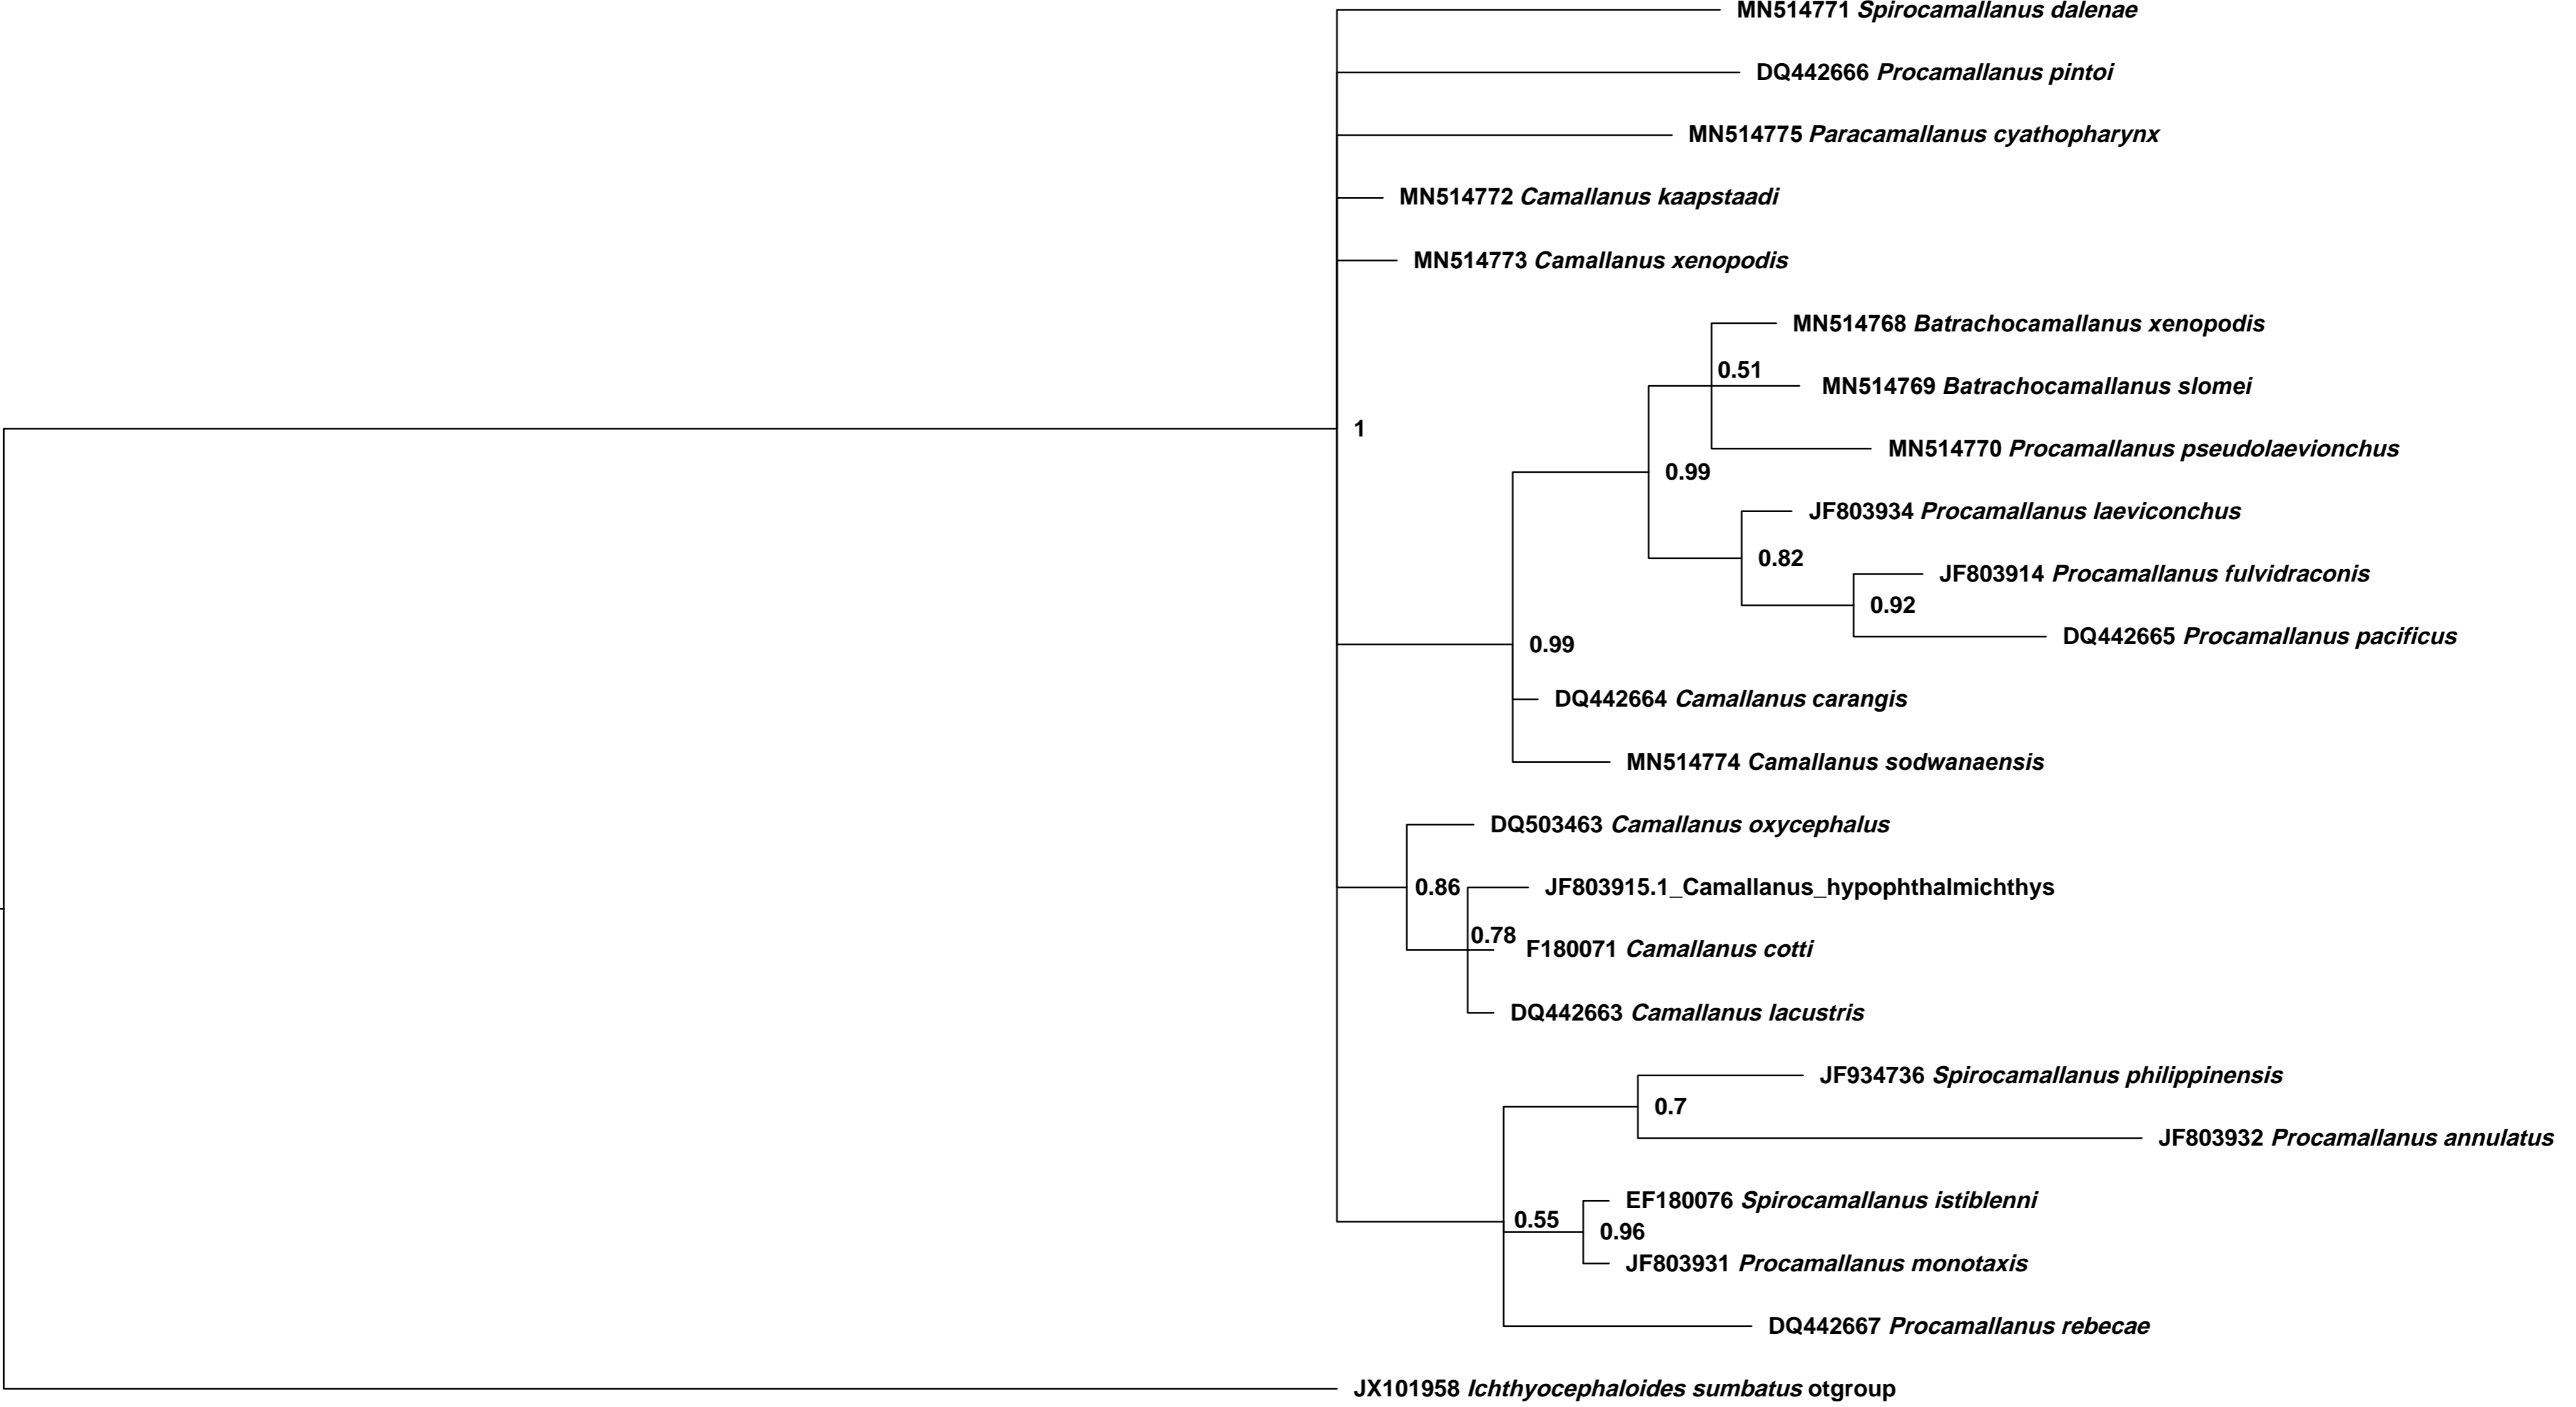

0.01

Supplement: mmc2.pdf [file mmc2.pdf]

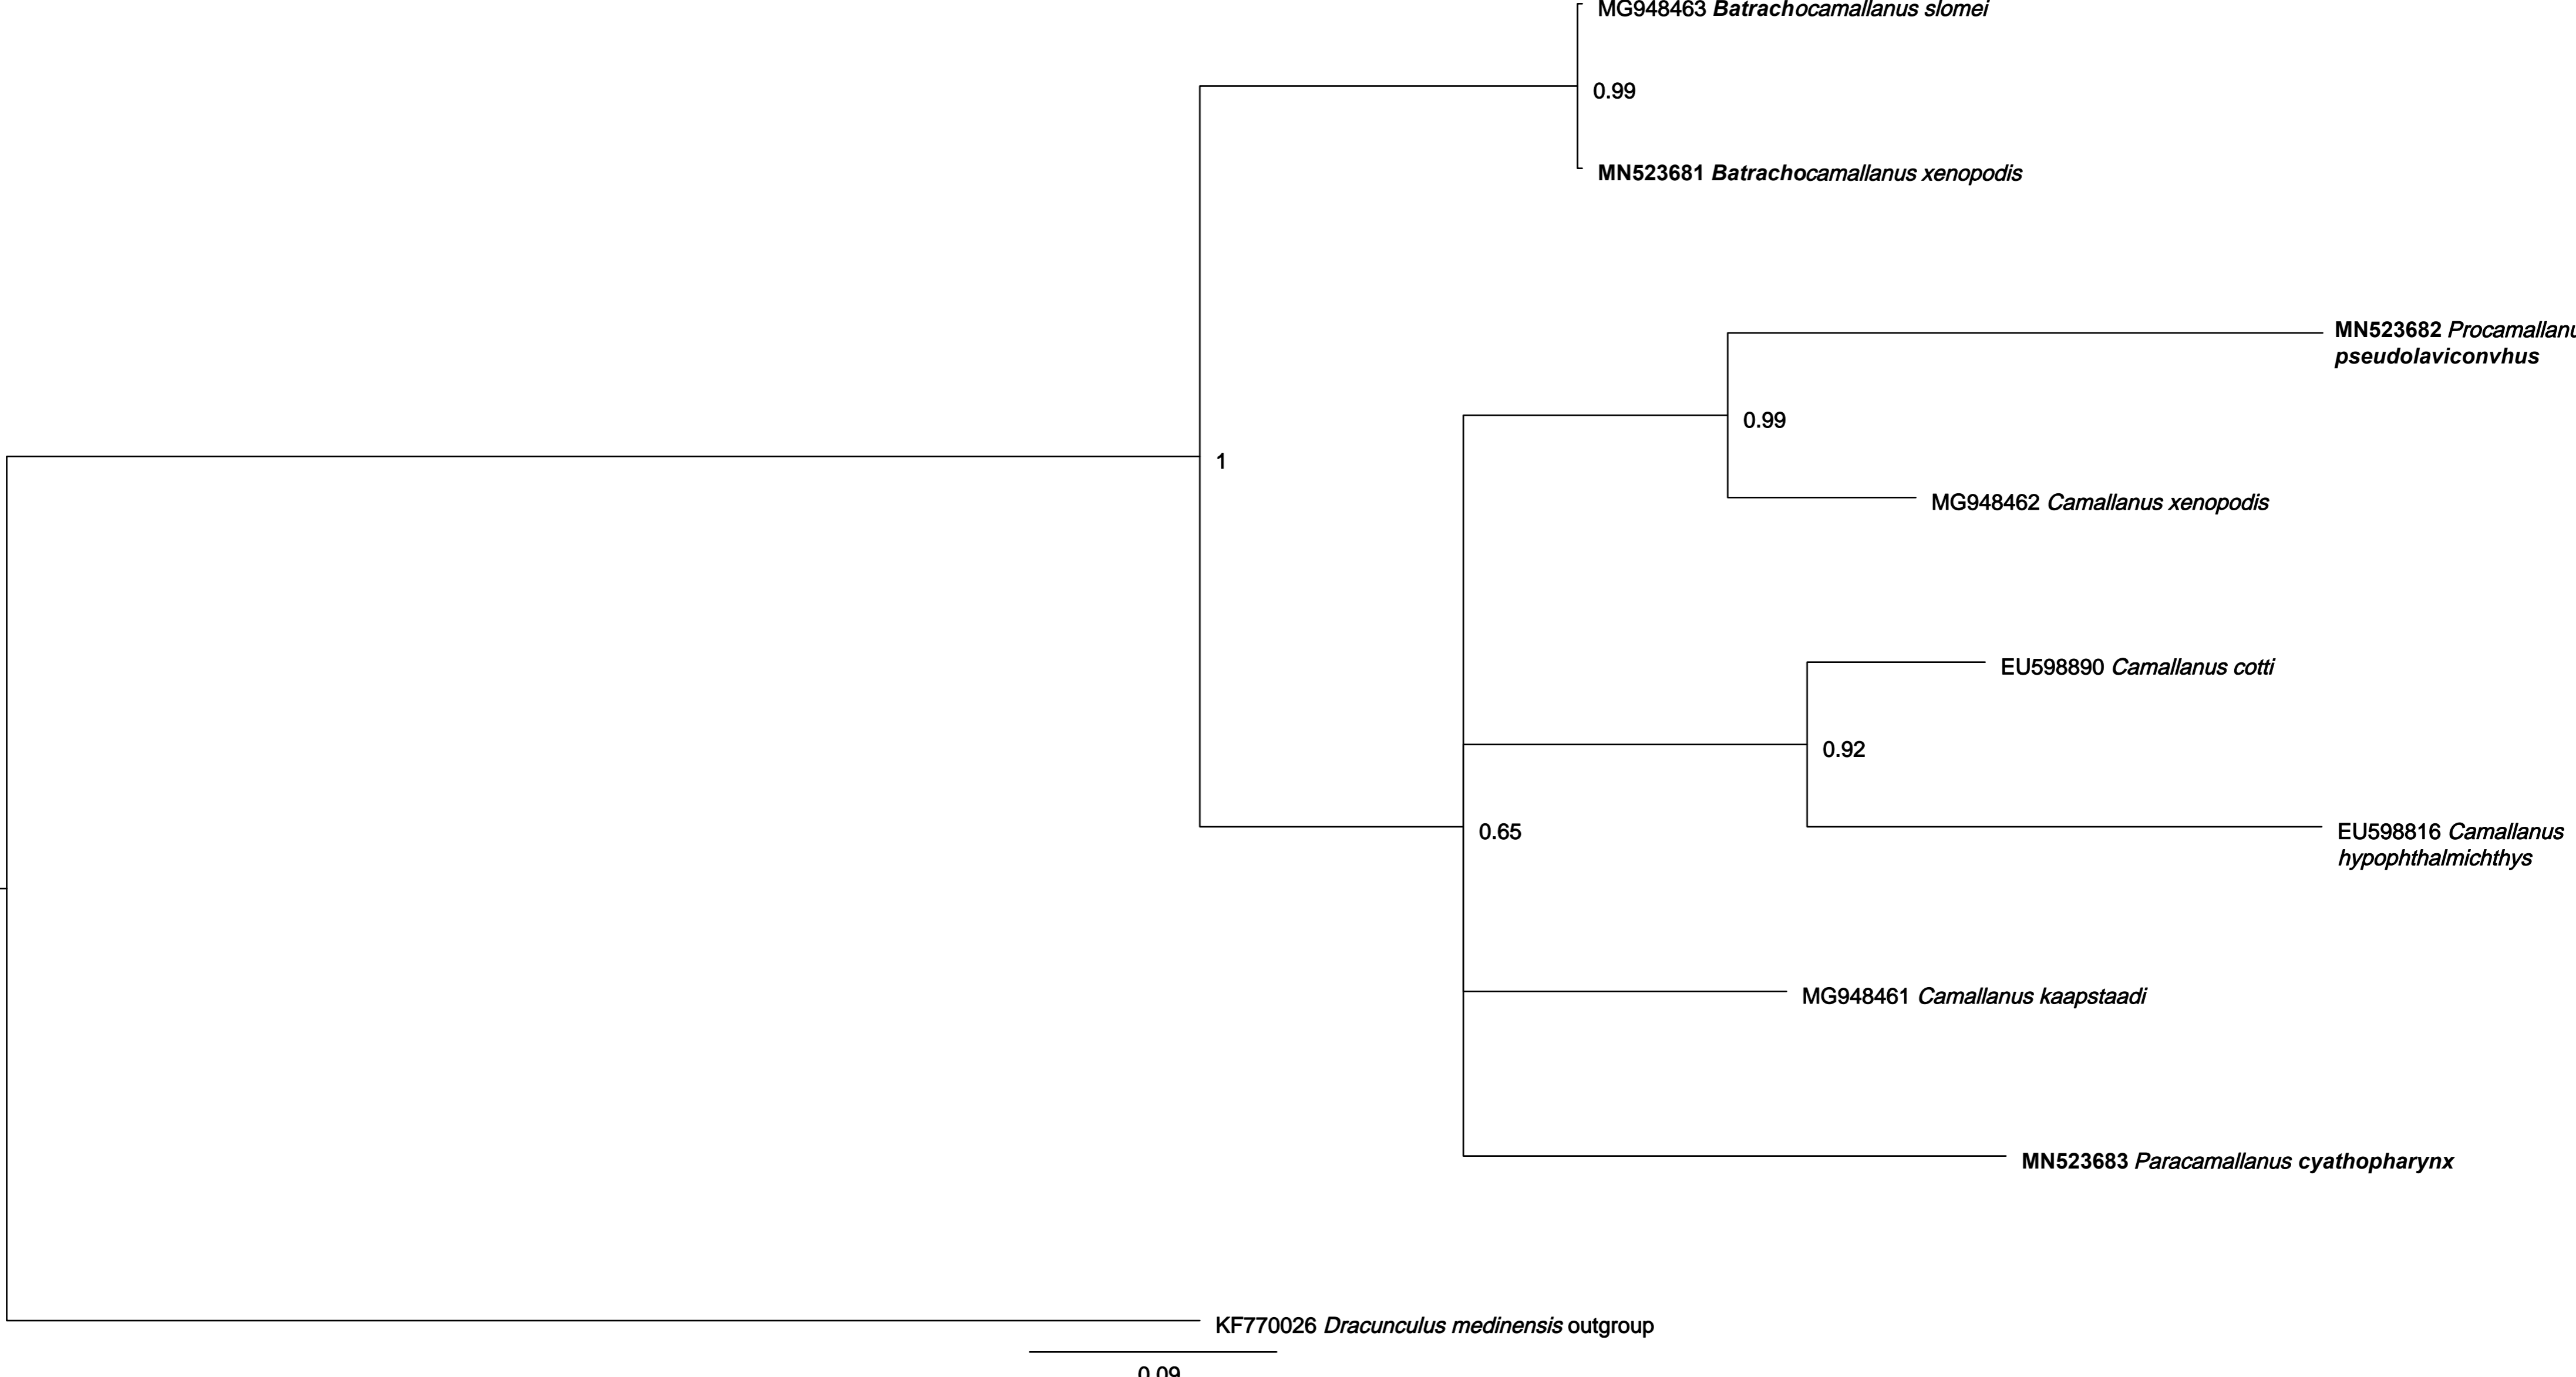

Supplement: mmc3.pdf [file mmc3.pdf]
